31 **ABSTRACT**

32 The foot fault scoring system of the ladder rung walking test is used to assess walking  
33 adaptability in rodents. However, the reliability of the ladder rung walking test foot fault  
34 score has not been properly investigated. This study was designed to address this issue. Two  
35 independent and blinded raters analyzed 20 rat and 20 mice videos. Each video was analyzed  
36 twice by the same rater (80 analyses per rater). The intraclass correlation coefficient (ICC)  
37 and the Kappa coefficient were employed to check the accuracy of agreement and reliability  
38 in the intra- and inter-rater analyses of the ladder rung walking test outcomes. Excellent intra-  
39 and inter-rater agreement was found for the forelimb, hindlimb and both limbs combined in  
40 rats and mice. The agreement level was also excellent for total crossing time, total time  
41 stopped and number of stops during the walking path. Rating individual scores in the foot  
42 fault score system (0 to 6) ranged from satisfactory to excellent, in terms of the intraclass  
43 correlation indexes. Moreover, we showed experienced and inexperienced raters can obtain  
44 reliable results if supervised training is provided. We conclude the ladder rung walking test is  
45 a reliable and useful tool to study walking adaptability in rodents and can help researchers  
46 address walking-related neurobiological questions.

47

48 **Key Words:** Walking, Locomotion, Rodentia, Reliability

49

50

51

52

53

54 **1. INTRODUCTION**

55 Walking adaptability can be defined as a complex sensory-motor function, qualified  
56 or required to control and coordinate various degrees of freedom in joints, in a variety of  
57 environmental contexts, or that interfere with locomotion [1-3]. Gait is influenced by the  
58 temporal and spatial integration of the cognitive and neuromusculoskeletal neural systems  
59 [4]. Moreover, the ability to adapt gait according to environmental context is a crucial aspect  
60 in maintaining body stability and preventing falls [5-8].

61 Whilst several studies into walking adaptability have focused on human  
62 biomechanics [2, 9, 10], animal models can usefully provide neurobiological insights at the  
63 cellular and molecular level [11-13]. For instance, the Ladder Rung Walking Test (LRWT)  
64 has been used to assess walking adaptability [14, 15] in unilateral ischemic injury in the  
65 motor cortex [12, 16]; spinal cord injury [17, 18]; dopaminergic depletion induced by 6-  
66 hydroxydopamine (a model of Parkinson's disease) [19]; neonatal white matter injury [20]  
67 and stress-related conditions [7, 13, 21].

68 The LRWT can assess walking patterns by using measures of inter-foot  
69 coordination, foot support, fore and hindlimb kinematics, step and gait cycles, gait speed, and  
70 the ability to adapt walking by applying a foot-fault score [16, 17]. The test provides  
71 measures of gait adaptability with emphasis in forelimb and hindlimb function by applying  
72 the foot-fault score [15]. The foot-fault score system is widely used in the literature since it  
73 requires only a hand camera and a minimally trained researcher to analyze the video and  
74 apply the foot-fault score [13, 14]. This method may avoid common pitfalls that occur when  
75 using reflective markers on the flexible skin of rodents [22, 23] and gives a measure of the  
76 success in adapting walking [7, 13].

77 The foot-fault score system is a 7-point category scale in which the quality and  
78 appropriateness of foot placement is judged by analyzing a video recording, frame-by-frame,

79 of rodents walking along a 1-meter long horizontal ladder. The rungs are arranged in a pattern  
80 that requires murine ability to adapt walking [14, 15]. However, to the best of our knowledge,  
81 this test has not been properly assessed regarding its intra-rater and inter-rater reliability and  
82 reproducibility, which is a source of uncertainty. Current studies usually elect a single rater to  
83 analyze all videos in an attempt to minimize bias, which is scientifically insufficient. The  
84 present study sought to provide scientific information regarding the external validity of the  
85 LRWT findings in rodents, thus contributing to advancements in the field of neurobiology of  
86 walking adaptability.

87

## 88 **2. MATERIALS AND METHODS**

89 We randomly select 40 video recordings of rodents from our lab database (20  
90 recordings of Wistar CrlCembe:WI rats and 20 of C57BL/6JUnib mice), that performed the  
91 horizontal ladder rung walking test. At the time of the original experiments, the animals were  
92 provided by the Center for Experimental Biological Models (CeMBE) of the Pontifical  
93 Catholic University of Rio Grande do Sul. The animals were housed in cages each containing  
94 three to four rodents on a 12-hour dark-light cycle with food and water available *ad libitum*,  
95 at a temperature of 22 to 24 °C. The experiments were carried out in accordance with the  
96 National Council for Animal Control and Experimentation (Concea) and all the procedures  
97 were approved by the University Animal Ethics Commission (CEUA) under protocol  
98 numbers 15/00442 and 15/00475.

### 99 **2.1 Ladder rung walking test**

100 We used two LRWT apparatus, one for rats and another adapted for mice. Both  
101 consisted clear Plexiglas side walls (100 cm long and 20 cm high). The diameter of the metal  
102 rungs varied, being 3 mm for rats and 2 mm for mice. The minimum and maximum gaps  
103 between the rungs also varied, being from 1 to 5 cm for rats and from 0.5 to 2.5 cm for mice.

104 In both cases, the ladders were elevated horizontally 30 cm above the ground, with a neutral  
105 cage placed in the starting position and the animal's home cage placed at the opposite end of  
106 the ladder (Figure 1). The between-wall distance was adjusted leaving 1 cm wider than the  
107 size of rodent to prevent the animal turning around during the crossing [13, 14, 24].

108

109 ----- Figure 1 here -----

110 **Figure 1.** Schematic illustration of the ladder rung walking test apparatus.

111

112 The pattern of the metal rungs demands different degrees of walking adaptability and can be  
113 used to vary the complexity of the test. A regular arrangement allows animals to learn the  
114 position of the rungs over training sessions and to anticipate limb placement (Figure. 1,  
115 Symmetrical Pattern). In irregular patterns, rungs are randomly repositioned in each trial to  
116 prevent the rodents learning the rung sequence. Thus, irregular patterns are more useful when  
117 studying walking adaptability (Figure. 1, Asymmetrical Pattern) [7, 13, 14]. In this study,  
118 only irregular rung patterns were analyzed.

119 In the test, the animals were placed at the beginning of the ladder, walked along it,  
120 adapting their foot placement on the rungs until reaching the home cage (Figure 1). While  
121 performing the test, we filmed the rodents using a camera (GoPro Hero 4, 12 megapixels). An  
122 acquisition rate of 240 frames per second (FPS) in a lateral view was adopted allowing a  
123 *post-hoc* frame-by-frame video analysis.

124

## 125 **2.2 Foot Fault Scoring System**

126 To assess the fore and hindlimb placement on the rungs, which requires precise and  
127 coordinated foot positioning as well as stride and inter-limbic coordination a quantitative foot  
128 fault scoring system [14] derived from a categorical analysis was used. In the system, a

129 frame-by-frame video recording analysis is performed to identify the steps in each limb and  
130 qualify foot placement using a 7-point category scale [14, 15] (Table 1). The score 0 is given  
131 when the limb did not touch the rung (missed a rung) and resulted in a fall (total miss). A fall  
132 is considered when the limbs fell between rungs and the animal's posture and balance are  
133 disturbed. Score 1 is given when the limb slipped off a rung and a fall occurred (deep slip).  
134 Score 2 is given when the limb slipped off a rung during weight bearing, but a fall did not  
135 occur and the rodent interrupts walking (slight slip). Score 3 is given when, before weight  
136 bearing the limb on a rung, the rodent quickly lifted and placed the foot on another rung  
137 (replacement). Score 4 occurs when the limb is clearly about to be placed on a rung, but the  
138 rodent quickly changes the feet placement to another rung without touching the first rung  
139 (correction). Score 4 is also given when the limb is placed on a rung, but the animal removes  
140 the foot and repositions it on the same rung. Score 5 is given when the limb is placed on the  
141 rung either using the wrist or digits for the forelimb or heel or toes for the hindlimb (partial  
142 placement). Finally, score 6 is given when the full body weight bearing is applied on a rung  
143 with the midportion of the foot (correct placement) (Table 1).

**Table 1.** Rating scale for foot placement in the LRWT.

| Category | Type of foot misplacement |
|----------|---------------------------|
| 0        | Total miss                |
| 1        | Deep Slip                 |
| 2        | Slight Slip               |
| 3        | Replacement               |
| 4        | Correction                |
| 5        | Partial Placement         |
| 6        | Correct Placement         |

144

145 The score given in each category is then multiplied by the frequency of foot  
146 placements in the same category. Afterwards, the sum of all the categories provides the total  
147 combined score (sum of the forelimb plus the hindlimb scores). The fully explained video  
148 protocol and all technical details to apply the foot fault score were previously published by  
149 Metz and Whishaw (2009).

150 In this study the following outcomes in the LRWT were assessed for inter-rater and  
151 intra-rater agreement: Total Crossing Time, Number of Stops, Total Time Stopped, Scores 0  
152 to 6 for forelimb, Total Score for forelimb, Scores 0 to 6 for hindlimb, Total Score of  
153 hindlimb and the Combined Total Score of limbs.

154 The skilled walking performance score (SWPS) was represented as a percentage of  
155 the maximum possible performance (100%) \*. The number of cycles (NC) each rodent took  
156 to cross the ladder was multiplied by 6 (the maximum score for each cycle in the foot fault  
157 score system) and the resulting number was considered the maximum possible performance  
158 of each animal in a trial (100%). Then, during a trial, each cycle was rated according to the  
159 foot fault score system and the sum of the obtained scores provided the total score in the trial  
160 (TS). Finally, the SWPS was represented as a percentage of the maximum possible  
161 performance (100%) [7, 25], as follows:

$$162 \quad SWPS = \frac{(TS * 100)}{(NC * 6)}, \text{ where:}$$

163 *SWPS* = skilled walking performance score

164 *TS* = total score in the trial

165 *NC*: number of cycles

166 6: maximum score for each cycle in the foot fault score system

167

### 168 **2.3 Foot placement reliability between inter- and intra-rater**

169 In order to assess inter- and intra-rater reliability, two independent and blinded raters  
170 (called I and II) analyzed 20 rat and 20 mice videos. Each video was analyzed twice by the  
171 same rater (80 analyses per rater). The videos were named randomly by another independent  
172 researcher (not involved in the analyses) to prevent raters I and II from perceiving half of the  
173 videos were the same. Thus, each video had a different number to ensure a blinded

174 reproducibility analysis. Rater I (Schiavo, A) was inexperienced in the foot fault score and  
175 received supervised training before starting data collection. Rater II (Martins, LA) had  
176 previous experience and publications using the LRWT [7, 13].

177

## 178 **2.4 Statistical Analysis**

179 Descriptive statistics were used to characterize the sample profile in the SWPS. The  
180 intraclass correlation coefficient (ICC) and the Kappa coefficient were employed to verify the  
181 accuracy of agreement and reliability in the inter-rater and intra-rater analyses of the foot  
182 fault scores. Agreement values in ICC greater than 0.75 were considered “excellent”;  
183 between 0.4 and 0.75 "satisfactory" and those <0.4 were considered "poor". When negative  
184 ICC values (difference between values greater than sample variance) occurred, the data were  
185 replaced by zero [26, 27]. The statistical analysis was performed using the software Statistical  
186 Package for the Social Sciences (SPSS) 20.0.

187

## 188 **3. RESULTS**

### 189 **3.1 Inter-rater reliability for rat**

190 The LRWT analyses in rat demonstrated rater I and II achieved an excellent  
191 agreement in the combined total score of limbs (ICC=0.938/p=0.0001). Regarding all the  
192 timed outcomes, the total crossing time (ICC=0.994/p=0.0001) and the total time stopped  
193 (ICC=0.992/p=0.0001) agreement levels were considered excellent, as were the variable  
194 number of stops (ICC=0.957/p=0.0001). Thus, the reliability between the total score for  
195 forelimb and hindlimb placement was shown to be excellent.

196 Furthermore, we analyzed the reliability among all scores described in the test,  
197 specifically, in the categories 0 to 6 for each of the limbs evaluated. For the forelimb, the data  
198 showed an excellent reliability in scores 0, 1 and 2, varying from ICC 0.839 to 1 (p=0.0001)



199 as well as for scores 5 and 6 (ICC 0.813 and 0.854, respectively /  $p=0.0001$ ). However, for  
 200 the forelimb scores 3 and 4, the raters obtained a satisfactory agreement (ICC 0.721 and  
 201 0.551, respectively /  $p\leq 0.045$ ). Similarly, for the hindlimb excellent reliability was obtained  
 202 for scores 0, 1, 3 and 4, with the ICC ranging from 0.889 to 0.931 ( $p=0.0001$ ). The reliability  
 203 for scores 2, 5 and 6 was also considered satisfactory (Table 2).  
 204

**Table 2.** Agreement between raters I and II regarding the outcomes obtained in the LRWT in rat.

| <b>Foot fault scoring in rat</b> |                    |                         |                |
|----------------------------------|--------------------|-------------------------|----------------|
| <b>Outcome</b>                   | <b>ICC (IC95%)</b> | <b>Cronbach's Alpha</b> | <b>p Value</b> |
| Combined Total Score             | 0.938(0.844-0.976) | 0.938                   | 0.0001*        |
| Total Crossing Time              | 0.994(0.985-0.998) | 0.994                   | 0.0001*        |
| Number of Stops                  | 0.957(0.892-0.983) | 0.957                   | 0.0001*        |
| Total Time Stopped               | 0.992(0.980-0.997) | 0.992                   | 0.0001*        |
| <b>Forelimb Placement</b>        |                    |                         |                |
| <b>Outcome</b>                   |                    |                         |                |
| Score 0                          | 1(1-1)             | 1                       | 0.0001*        |
| Score 1                          | 0.839(0.594-0.936) | 0.839                   | 0.0001*        |
| Score 2                          | 0.903(0.754-0.961) | 0.903                   | 0.0001*        |
| Score 3                          | 0.721(0.295-0.889) | 0.721                   | 0.004*         |
| Score 4                          | 0.551(0.000-0.822) | 0.551                   | 0.045*         |
| Score 5                          | 0.854(0.631-0.942) | 0.854                   | 0.0001*        |
| Score 6                          | 0.813(0.528-0.926) | 0.813                   | 0.0001*        |
| Total Score                      | 0.879(0.695-0.952) | 0.879                   | 0.0001*        |
| <b>Hindlimb Placement</b>        |                    |                         |                |
| <b>Outcome</b>                   |                    |                         |                |
| Score 0                          | 0.889(0.719-0.956) | 0.889                   | 0.0001*        |
| Score 1                          | 0.931(0.826-0.973) | 0.931                   | 0.0001*        |
| Score 2                          | 0.593(0.000-0.839) | 0.593                   | 0.028*         |
| Score 3                          | 0.889(0.719-0.956) | 0.889                   | 0.0001*        |
| Score 4                          | 0.889(0.719-0.956) | 0.889                   | 0.0001*        |
| Score 5                          | 0.41(0.000-0.620)  | 0.41                    | 0.456          |
| Score 6                          | 0.592(0.000-0.839) | 0.592                   | 0.029*         |
| Total Score                      | 0.931(0.826-0.973) | 0.931                   | 0.0001*        |

\* Statistically significant difference.

205

206           The individual results for each animal in relation to SWPS are shown in Figure 2. In  
207 addition, the frequency of each score (1 to 6) for hindlimb and forelimb of each rodent is  
208 shown in Figure 3, 4 and 5.

209

210           **Figure 2.** SWPS obtained by Rater I and Rater II.

211           **Figure 3.** SWPS obtained at first (a) and second assessment (b) by Rater I and Rater II.

212           **Figure 4.** Frequency of scores in the foot fault score (%).

213           **Figure 5.** Frequency of scores in the foot fault score (%) in the first (a) and second  
214 assessment (b) by Rater I and Rater II.

215

### 216 **3.2 Inter-rater reliability for mice**

217           The inter-rater reliability score system for mice is shown in Table 3. We observed a  
218 strong agreement between the raters in the combined total score (ICC=0.954/P=0.0001), total  
219 crossing time (ICC=1/P=0.0001), number of steps (ICC=0.922/P=0.0001) and total time  
220 stopped (ICC=0.998/P=0.0001). In addition, the forelimb and hindlimb placement scores  
221 showed excellent agreement in the LRWT, with less consistency for forelimb placement  
222 (score 3) (ICC=0.466/P=0.090) and hindlimb correction (score 4) (ICC=0.484/p=0.079).  
223 Overall, the total scores for the forelimb (ICC=0.925/p=0.0001) and hindlimb  
224 (ICC=0.919/p=0.0001) placement between raters I and II showed strong agreement.

225

226

**Table 3.** Agreement between raters I and II regarding the outcomes (scores) recorded in the LRWT in mice.

| <b>Foot fault scoring in mice</b> |                    |                         |                |
|-----------------------------------|--------------------|-------------------------|----------------|
| <b>Outcome</b>                    | <b>ICC (IC95%)</b> | <b>Cronbach's Alpha</b> | <b>P Value</b> |
| Combined Total Score              | 0.954(0.883-0.982) | 0.954                   | 0.0001*        |
| Total Crossing Time               | 1(0.999-1)         | 1                       | 0.0001*        |
| Number of Stops                   | 0.922(0.802-0.969) | 0.922                   | 0.0001*        |
| Total Time Stopped                | 0.998(0.995-0.999) | 0.998                   | 0.0001*        |
| <b>Forelimb Placement</b>         |                    |                         |                |
| <b>Outcome</b>                    |                    |                         |                |
| Score 0                           | 0.889(0.719-0.956) | 0.889                   | 0.0001*        |
| Score 1                           | 0.755(0.381-0.903) | 0.755                   | 0.002*         |
| Score 2                           | 0.699(0.239-0.881) | 0.699                   | 0.006*         |
| Score 3                           | 0.466(0.000-0.789) | 0.466                   | 0.090          |
| Score 4                           | 0.904(0.757-0.962) | 0.904                   | 0.0001*        |
| Score 5                           | 0.830(0.571-0.933) | 0.830                   | 0.0001*        |
| Score 6                           | 0.712(0.271-0.886) | 0.721                   | 0.005*         |
| Total Score                       | 0.925(0.812-0.970) | 0.925                   | 0.0001*        |
| <b>Hindlimb Placement</b>         |                    |                         |                |
| <b>Outcome</b>                    |                    |                         |                |
| Score 0                           | 0.822(0.550-0.929) | 0.822                   | 0.0001*        |
| Score 1                           | 0.889(0.719-0.956) | 0.889                   | 0.0001*        |
| Score 2                           | 0.938(0.844-0.976) | 0.938                   | 0.0001*        |
| Score 3                           | 0.751(0.371-0.901) | 0.751                   | 0.002*         |
| Score 4                           | 0.484(0.000-0.796) | 0.484                   | 0.079          |
| Score 5                           | 0.622(0.046-0.850) | 0.622                   | 0.0001*        |
| Score 6                           | 0.764(0.405-0.907) | 0.764                   | 0.001*         |
| Total Score                       | 0.919(0.795-0.968) | 0.919                   | 0.0001*        |

\* Statistically significant difference.

227

### 228 3.3 Intra-rater reliability for rat

229 Table 4 shows the intra-rater analyses in rat. We found excellent agreement in the  
 230 combined total score, total crossing time, number of stops and total time stopped for both  
 231 raters. Regarding score evaluation, rater I obtained excellent agreement in all the scores for  
 232 the forelimb (ICC between 0.899 to 0.989 / p=0.0001). Rater II achieved excellent agreement  
 233 in all scores for forelimb (ICC between 0.787 to 0.920), except for score 6, which was  
 234 considered satisfactory (ICC=0.652 / p=0.13).

**Table 4.** Intra-rater agreement on outcomes in the analyses of the LRWT in rat.

| Outcome                   | Rater I            |                  |         | Rater II           |                  |         |
|---------------------------|--------------------|------------------|---------|--------------------|------------------|---------|
|                           | ICC (IC95%)        | Cronbach's Alpha | P Value | ICC (IC95%)        | Cronbach's Alpha | P Value |
| Combined Total Score      | 0.969(0.922-0.988) | 0.969            | 0.0001* | 0.950(0.875-0.980) | 0.950            | 0.0001* |
| Total Crossing Time       | 0.993(0.982-0.997) | 0.993            | 0.0001* | 0.981(0.953-0.993) | 0.981            | 0.0001* |
| Number of Stops           | 0.950(0.873-0.980) | 0.950            | 0.0001* | 0.915(0.786-0.966) | 0.915            | 0.0001* |
| Total Time Stopped        | 0.806(0.509-0.923) | 0.806            | 0.0001* | 0.939(0.847-0.976) | 0.939            | 0.0001* |
| <b>Forelimb Placement</b> |                    |                  |         |                    |                  |         |
| Score 0                   | 0.899(0.719-0.956) | 0.899            | 0.0001* | 0.919(0.796-0.968) | 0.919            | 0.0001* |
| Score 1                   | 0.889(0.719-0.956) | 0.889            | 0.0001* | 0.842(0.600-0.937) | 0.842            | 0.0001* |
| Score 2                   | 0.989(0.973-0.996) | 0.989            | 0.0001* | 0.877(0.688-0.951) | 0.877            | 0.0001* |
| Score 3                   | 0.978(0.944-0.991) | 0.978            | 0.0001* | 0.920(0.797-0.968) | 0.920            | 0.0001* |
| Score 4                   | 0.941(0.851-0.977) | 0.941            | 0.0001* | 0.849(0.618-0.940) | 0.849            | 0.0001* |
| Score 5                   | 0.948(0.869-0.979) | 0.948            | 0.0001* | 0.787(0.462-0.916) | 0.787            | 0.001*  |
| Score 6                   | 0.905(0.761-0.963) | 0.905            | 0.0001* | 0.652(0.121-0.862) | 0.652            | 0.13    |
| Total Score               | 0.916(0.787-0.967) | 0.916            | 0.0001* | 0.875(0.685-0.951) | 0.875            | 0.0001* |
| <b>Hindlimb Placement</b> |                    |                  |         |                    |                  |         |
| Score 0                   | 1(1-1)             | 1                | 0.0001* | 1(1-1)             | 1                | 0.0001* |
| Score 1                   | 1(1-1)             | 1                | 0.0001* | 0.962(0.904-0.985) | 0.962            | 0.0001* |
| Score 2                   | 0.838(0.591-0.936) | 0.838            | 0.0001* | 0.829(0.567-0.932) | 0.829            | 0.0001* |
| Score 3                   | 1(1-1)             | 1                | 0.0001* | 1(1-1)             | 1                | 0.0001* |
| Score 4                   | 1(1-1)             | 1                | 0.0001* | 0.904(0.758-0.962) | 0.904            | 0.0001* |
| Score 5                   | 0.992(0.980-0.997) | 0.992            | 0.0001* | 0.637(0.83-0.856)  | 0.637            | 0.16    |
| Score 6                   | 0.982(0.954-0.993) | 0.982            | 0.0001* | 0.810(0.519-0.925) | 0.810            | 0.0001* |
| Total Score               | 0.988(0.970-0.995) | 0.988            | 0.0001* | 0.970(0.924-0.988) | 0.970            | 0.0001* |

\* Statistically significant difference.

236 In relation to hindlimb agreement, rater I obtained a similar excellent degree of  
237 agreement to that for the forelimb, ranging from ICC 0.838 to 1 /  $p=0.0001$ . Whilst rater II  
238 achieved a lower agreement than rater I, the ICC was very good, ranging from 0.637 to 1,  
239 with only score 5 graded as satisfactory (ICC 0.637). Moreover, both raters obtained  
240 excellent intra-rater scores in the outcomes: combined total score, total crossing time, number  
241 of steps, total time stopped and total score for forelimb and hindlimb, ranging from ICC  
242 0.806 to 0.993 for rater I and ICC 0.915 to 0.981 for rater II.

243

#### 244 **3.4 Intra-rater reliability for mice**

245 Overall, the intra-rater reliability for mice was excellent for both raters (Table 5). For  
246 rater I, in the forelimb foot placement agreement for all the 7 scores were excellent (ICC  
247 0.939 to 1 /  $p=0.0001$ ). For rater II, the agreement was also excellent, varying between ICC  
248 0.778 and 0.968 for scores 0 to 5. However, score 6 was considered satisfactory (ICC 0.488 /  
249  $p=0.077$ ). Regarding the hindlimb placement, similar results were found, with the raters only  
250 differing in score 6 (rater II obtained a lower ICC: 0.749 /  $p=0.002$ ) (Table 5).

**Table 5.** Intra-rater agreement on outcomes in the analyses of the LRWT in mice.

| <b>Outcome</b>            | <b>Rater I</b>     |                         |                | <b>Rater II</b>    |                         |                |
|---------------------------|--------------------|-------------------------|----------------|--------------------|-------------------------|----------------|
|                           | <b>ICC (IC95%)</b> | <b>Cronbach's Alpha</b> | <b>P Value</b> | <b>ICC (IC95%)</b> | <b>Cronbach's Alpha</b> | <b>P Value</b> |
| Combined Total Score      | 0.971(0.926-0.988) | 0.971                   | 0.0001*        | 0.963(0.906-0.985) | 0.963                   | 0.0001*        |
| Total Crossing Time       | 1(1-1)             | 1                       | 0.0001*        | 0.999(0.998-1)     | 0.999                   | 0.0001*        |
| Number of Stops           | 0.948(0.868-0.979) | 0.948                   | 0.0001*        | 0.774(0.429-0.911) | 0.774                   | 0.001*         |
| Total Time Stopped        | 0.988(0.969-0.995) | 0.988                   | 0.0001*        | 0.985(0.963-0.994) | 0.985                   | 0.0001*        |
| <b>Forelimb Placement</b> |                    |                         |                |                    |                         |                |
| Score 0                   | 1(1-1)             | 1                       | 0.0001*        | 0.919(0.796-0.968) | 0.919                   | 0.0001*        |
| Score 1                   | 1(1-1)             | 1                       | 0.0001*        | 0.778(0.440-0.912) | 0.778                   | 0.001*         |
| Score 2                   | 0.979(0.947-0.992) | 0.979                   | 0.0001*        | 0.829(0.568-0.932) | 0.829                   | 0.0001*        |
| Score 3                   | 0.979(0.948-0.992) | 0.979                   | 0.0001*        | 0.899(0.746-0.960) | 0.899                   | 0.0001*        |
| Score 4                   | 0.939(0.846-0.976) | 0.939                   | 0.0001*        | 0.956(0.888-0.982) | 0.956                   | 0.0001*        |
| Score 5                   | 0.982(0.965-0.995) | 0.982                   | 0.0001*        | 0.928(0.817-0.971) | 0.928                   | 0.0001*        |
| Score 6                   | 0.950(0.873-0.980) | 0.950                   | 0.0001*        | 0.488(0.000-0.797) | 0.488                   | 0.077          |
| Total Score               | 0.978(0.944-0.991) | 0.978                   | 0.0001*        | 0.934(0.833-0.974) | 0.934                   | 0.0001*        |
| <b>Hindlimb Placement</b> |                    |                         |                |                    |                         |                |
| Score 0                   | 0.919(0.796-0.968) | 0.919                   | 0.0001*        | 1(1-1)             | 1                       | 0.0001*        |
| Score 1                   | 0.889(0.719-0.956) | 0.889                   | 0.0001*        | 0.889(0.719-0.956) | 0.889                   | 0.0001*        |
| Score 2                   | 0.978(0.945-0.991) | 0.978                   | 0.0001*        | 0.963(0.908-0.986) | 0.936                   | 0.0001*        |
| Score 3                   | 0.936(0.839-0.975) | 0.936                   | 0.0001*        | 0.821(0.548-0.929) | 0.821                   | 0.0001*        |
| Score 4                   | 1(1-1)             | 1                       | 0.0001*        | 0.886(0.713-0.955) | 0.886                   | 0.0001*        |
| Score 5                   | 0.982(0.953-0.993) | 0.982                   | 0.0001*        | 0.861(0.649-0.945) | 0.861                   | 0.0001*        |
| Score 6                   | 0.958(0.895-0.983) | 0.958                   | 0.0001*        | 0.749(0.367-0.901) | 0.749                   | 0.002*         |
| Total Score               | 0.950(0.873-0.980) | 0.950                   | 0.0001*        | 0.951(0.876-0.981) | 0.951                   | 0.0001*        |

\* Statistically significant difference.

252 **4. DISCUSSION**

253 Studying walking adaptability in rodents is of importance to translational neuroscience,  
254 since the irregular distribution of the rungs in the walking path requires the animal's capacity  
255 to adjust its stride length, paw placement and control the center of mass. These adaptive motor  
256 control strategies are also found and widely studied in humans [28]. Rodents and humans  
257 perform some similar movements to protect an injured limb and/or prevent falls [29]. The  
258 ladder rung walking test fulfils the fundamental principles of walking adaptability such as  
259 pattern of rhythmic reciprocal limb movement; supporting body balance against gravity; and  
260 adapting locomotion in response to environmental challenges [1].

261 Metz and Whishaw created the ladder rung walking test in 2002 to assess forelimb  
262 and hindlimb stepping, placing, and coordination in models of cortical and subcortical injury.  
263 According to the authors, the test is a sensitive skilled task for assessing slight impairments of  
264 walking function and is useful when assessing functional recovery following brain or spinal  
265 cord injury and the effectiveness of rehabilitative therapies [14, 30]. Locomotion during the  
266 ladder rung walking test is known to depend on ascending and descending neural pathways,  
267 since accurately crossing the rungs requires finely adjusted motor control, balance, limb  
268 coordination and muscle control [7, 13, 14].

269 However, to determine the psychometric properties of behavioral tests it is essential to  
270 obtain reliable, consistent and scientifically valid findings [31]. Both, intra- and inter-rater  
271 agreement are important metrics to ensure reliability and reproducibility [32]. Here, we  
272 sought to assess intra- and inter-rater agreement in the foot fault score of the ladder rung  
273 walking test using two strains of rodents – Wistar rats and C57BL/6 mice. Two independent  
274 researchers (with and without previous experience using the test's scoring system) analyzed  
275 the videos. Our findings suggest the foot fault score system of the ladder rung walking test is  
276 a useful, reliable and consistent tool for studying skilled walking performance in rodents. We

277 also found excellent inter and intra-rater reliability for “total crossing time”, “number of  
278 stops” and “total time stopped”. The agreement measures provided by this study suggest data  
279 obtained by different research groups using the ladder rung walking test should be  
280 comparable [33] and encourage the use of the test in further studies.

281         The ladder rung walking test is an interesting option for researchers investigating  
282 neural mechanisms involved in the ability to adapt walking [7, 13, 15, 34]. Since the score  
283 reflects the animal’s ability to adapt limb placement and position in a contextual environment  
284 [14, 29], the foot fault score system is useful to study walking adaptability in rodents [7, 13].  
285 Whilst traditional biomechanical models of walking analysis require expensive devices,  
286 constant animal handling for placing reflective markers and development of signal-processing  
287 routines [35, 36], the ladder rung walking test provides walking adaptability assessment using  
288 a fast, simple and inexpensive method.

289         Whereas we observed satisfactory to excellent intraclass correlation indexes in rating  
290 individual scores (0 to 6), caution is necessary when using the foot fault score system.  
291 Individual scores present subtle differences that may confuse untrained raters. For example,  
292 differentiating between scores 3 (replacement) and 4 (correction) requires attention to  
293 identify whether the rodent touched the rung before completing paw placement. Moreover, in  
294 some situations, the rodent supports a single paw simultaneously on two rungs that are placed  
295 too close each other. This may cause confusion in scoring 5 (partial placement) or 6 (correct  
296 placement). In addition, rodents sometimes place their paw on the acrylic wall to help  
297 walking forward, a behavior that is not considered in the foot fault score system.  
298 Furthermore, the subtle differences between score 1 (deep slip) and 2 (slight slip) may cause  
299 uncertainty for untrained raters. Finally, the speed of the video recording may also change the  
300 perception of the raters during the gait cycle analysis [37]. Thus, the present results suggest  
301 experienced and inexperienced raters can get reliable results if appropriate training is



302 provided. We highly recommend the careful study of the article and videos previously  
303 published by Metz and Whishaw [14, 15] and supervised practice before using the foot fault  
304 scoring system.

305 Despite being originally designed for rats, the ladder rung walking test can be used in  
306 mice with some adjustments to the apparatus, namely a) the diameter of the rungs should be  
307 reduced to allow a proper grip and paw placement; and b) the minimal and maximal between-  
308 rung interval should be changed, as previously described [13, 24]. Our findings show these  
309 adaptations are valid to obtain reliable results in C57BL/6 mice and may be valid for other  
310 mice strains.

311 This study has some limitations. First, only two rodent strains were assessed.  
312 Anyway, the current findings provide evidence of the accuracy and reliability of the foot fault  
313 score in both Wistar rats and C57BL/6 mice. Second, we did not compare specific injury  
314 models. Despite which, all individual scores (0 to 6) in the foot fault score were found in the  
315 studied videos, which minimize this concern.

## 316 **5. CONCLUSION**

317 We conclude the foot fault score of the ladder rung walking test is a reliable and  
318 useful tool to study walking adaptability in rodents. Moreover, experienced and  
319 inexperienced raters can obtain reliable results if previous supervised training is provided.  
320 These findings are of importance for researchers working in the field of translational  
321 neuroscience and motor control and impact on the comparability of results obtained  
322 worldwide using the foot fault score in the ladder rung walking test.

## 323 **ACKNOWLEDGMENTS**

324 We thank Filipe Mello Medeiros and Rodrigo Orso for their valuable contribution in  
325 acquiring the video recordings.

326

327 **REFERENCES**

- 328 1. Balasubramanian CK, Clark DJ, Fox EJ. Walking adaptability after a stroke and its assessment  
329 in clinical settings. *Stroke Res Treat.* 2014;2014:591013. Epub 2014/09/26. doi:  
330 10.1155/2014/591013. PubMed PMID: 25254140; PubMed Central PMCID: PMC4164852.
- 331 2. Ducharme SW, Liddy JJ, Haddad JM, Busa MA, Claxton LJ, van Emmerik REA. Association  
332 between stride time fractality and gait adaptability during unperturbed and asymmetric walking.  
333 *Hum Mov Sci.* 2018;58:248-59. Epub 2018/03/06. doi: 10.1016/j.humov.2018.02.011. PubMed  
334 PMID: 29505917.
- 335 3. Houdijk H, van Ooijen MW, Kraal JJ, Wiggerts HO, Polomski W, Janssen TW, et al. Assessing  
336 gait adaptability in people with a unilateral amputation on an instrumented treadmill with a  
337 projected visual context. *Phys Ther.* 2012;92(11):1452-60. Epub 2012/07/28. doi:  
338 10.2522/ptj.20110362. PubMed PMID: 22836005.
- 339 4. Shimada H, Ishii K, Ishiwata K, Oda K, Suzukawa M, Makizako H, et al. Gait adaptability and  
340 brain activity during unaccustomed treadmill walking in healthy elderly females. *Gait Posture.*  
341 2013;38(2):203-8. Epub 2012/12/26. doi: 10.1016/j.gaitpost.2012.11.008. PubMed PMID: 23266043.
- 342 5. Caetano MJD, Lord SR, Brodie MA, Schoene D, Pelicioni PHS, Sturnieks DL, et al. Executive  
343 functioning, concern about falling and quadriceps strength mediate the relationship between  
344 impaired gait adaptability and fall risk in older people. *Gait Posture.* 2018;59:188-92. Epub  
345 2017/10/22. doi: 10.1016/j.gaitpost.2017.10.017. PubMed PMID: 29055270.
- 346 6. Esteves PO, Oliveira LA, Nogueira-Campos AA, Saunier G, Pozzo T, Oliveira JM, et al. Motor  
347 planning of goal-directed action is tuned by the emotional valence of the stimulus: a kinematic  
348 study. *Sci Rep.* 2016;6:28780. Epub 2016/07/02. doi: 10.1038/srep28780. PubMed PMID: 27364868;  
349 PubMed Central PMCID: PMC4929477.
- 350 7. Medeiros FM, de Carvalho Myskiw J, Baptista PPA, Neves LT, Martins LA, Furini CRG, et al.  
351 Can an aversive, extinction-resistant memory trigger impairments in walking adaptability? An  
352 experimental study using adult rats. *Neurosci Lett.* 2018;665:224-8. Epub 2017/12/13. doi:  
353 10.1016/j.neulet.2017.12.017. PubMed PMID: 29229398.
- 354 8. van Ooijen MW, Heeren A, Smulders K, Geurts AC, Janssen TW, Beek PJ, et al. Improved gait  
355 adjustments after gait adaptability training are associated with reduced attentional demands in  
356 persons with stroke. *Exp Brain Res.* 2015;233(3):1007-18. Epub 2014/12/30. doi: 10.1007/s00221-  
357 014-4175-7. PubMed PMID: 25537466.
- 358 9. Hawkins KA, Clark DJ, Balasubramanian CK, Fox EJ. Walking on uneven terrain in healthy  
359 adults and the implications for people after stroke. *NeuroRehabilitation.* 2017;41(4):765-74. Epub  
360 2017/09/28. doi: 10.3233/nre-172154. PubMed PMID: 28946584; PubMed Central PMCID:  
361 PMC45845824.
- 362 10. Lanini J, Duburcq A, Razavi H, Le Goff CG, Ijspeert AJ. Interactive locomotion: Investigation  
363 and modeling of physically-paired humans while walking. *PLoS One.* 2017;12(9):e0179989. Epub  
364 2017/09/07. doi: 10.1371/journal.pone.0179989. PubMed PMID: 28877161; PubMed Central  
365 PMCID: PMC5587243.
- 366 11. Mestriner RG, Miguel PM, Bagatini PB, Saur L, Boisserand LS, Baptista PP, et al. Behavior  
367 outcome after ischemic and hemorrhagic stroke, with similar brain damage, in rats. *Behav Brain Res.*  
368 2013;244:82-9. Epub 2013/02/14. doi: 10.1016/j.bbr.2013.02.001. PubMed PMID: 23403282.
- 369 12. Soleman S, Yip P, Leasure JL, Moon L. Sustained sensorimotor impairments after endothelin-  
370 1 induced focal cerebral ischemia (stroke) in aged rats. *Exp Neurol.* 2010;222(1):13-24. Epub  
371 2009/11/17. doi: 10.1016/j.expneurol.2009.11.007. PubMed PMID: 19913535; PubMed Central  
372 PMCID: PMC2864515.
- 373 13. Wearick-Silva LE, Orso R, Martins LA, Creutzberg KC, Centeno-Silva A, Xavier LL, et al. Dual  
374 influences of early life stress induced by limited bedding on walking adaptability and Bdnf/TrkB and  
375 Drd1/Drd2 gene expression in different mouse brain regions. *Behav Brain Res.* 2019;359:66-72. Epub  
376 2018/10/23. doi: 10.1016/j.bbr.2018.10.025. PubMed PMID: 30347225.

- 377 14. Metz GA, Whishaw IQ. Cortical and subcortical lesions impair skilled walking in the ladder  
378 rung walking test: a new task to evaluate fore- and hindlimb stepping, placing, and co-ordination. *J*  
379 *Neurosci Methods*. 2002;115(2):169-79. Epub 2002/05/07. doi: 10.1016/s0165-0270(02)00012-2.  
380 PubMed PMID: 11992668.
- 381 15. Metz GA, Whishaw IQ. The ladder rung walking task: a scoring system and its practical  
382 application. *J Vis Exp*. 2009;(28). Epub 2009/06/16. doi: 10.3791/1204. PubMed PMID: 19525918;  
383 PubMed Central PMCID: PMCPMC2796662.
- 384 16. Antonow-Schlorke I, Ehrhardt J, Knieling M. Modification of the ladder rung walking task-  
385 new options for analysis of skilled movements. *Stroke Res Treat*. 2013;2013:418627. Epub  
386 2013/04/12. doi: 10.1155/2013/418627. PubMed PMID: 23577278; PubMed Central PMCID:  
387 PMCPMC3610362.
- 388 17. Guo Y, Hu H, Wang J, Zhang M, Chen K. Walking Function After Cervical Contusion and  
389 Distraction Spinal Cord Injuries in Rats. *J Exp Neurosci*. 2019;13:1179069519869615. Epub  
390 2019/08/29. doi: 10.1177/1179069519869615. PubMed PMID: 31456646; PubMed Central PMCID:  
391 PMCPMC6702777.
- 392 18. Sandner B, Puttagunta R, Motsch M, Bradke F, Ruschel J, Blesch A, et al. Systemic epothilone  
393 D improves hindlimb function after spinal cord contusion injury in rats. *Exp Neurol*. 2018;306:250-9.  
394 Epub 2018/02/07. doi: 10.1016/j.expneurol.2018.01.018. PubMed PMID: 29408734.
- 395 19. Faraji J, Metz GA. Sequential bilateral striatal lesions have additive effects on single skilled  
396 limb use in rats. *Behav Brain Res*. 2007;177(2):195-204. Epub 2006/12/22. doi:  
397 10.1016/j.bbr.2006.11.034. PubMed PMID: 17182115.
- 398 20. Ueda Y, Misumi S, Suzuki M, Ogawa S, Nishigaki R, Ishida A, et al. Disorganization of  
399 Oligodendrocyte Development in the Layer II/III of the Sensorimotor Cortex Causes Motor  
400 Coordination Dysfunction in a Model of White Matter Injury in Neonatal Rats. *Neurochem Res*.  
401 2018;43(1):136-46. Epub 2017/08/02. doi: 10.1007/s11064-017-2352-3. PubMed PMID: 28762105.
- 402 21. Metz GA, Ng JW, Kovalchuk I, Olson DM. Ancestral experience as a game changer in stress  
403 vulnerability and disease outcomes. *Bioessays*. 2015;37(6):602-11. Epub 2015/03/12. doi:  
404 10.1002/bies.201400217. PubMed PMID: 25759985.
- 405 22. Bauman JM, Chang YH. High-speed X-ray video demonstrates significant skin movement  
406 errors with standard optical kinematics during rat locomotion. *J Neurosci Methods*. 2010;186(1):18-  
407 24. Epub 2009/11/11. doi: 10.1016/j.jneumeth.2009.10.017. PubMed PMID: 19900476; PubMed  
408 Central PMCID: PMCPMC2814909.
- 409 23. Filipe VM, Pereira JE, Costa LM, Maurício AC, Couto PA, Melo-Pinto P, et al. Effect of skin  
410 movement on the analysis of hindlimb kinematics during treadmill locomotion in rats. *J Neurosci*  
411 *Methods*. 2006;153(1):55-61. Epub 2005/12/13. doi: 10.1016/j.jneumeth.2005.10.006. PubMed  
412 PMID: 16337686.
- 413 24. Farr TD, Liu L, Colwell KL, Whishaw IQ, Metz GA. Bilateral alteration in stepping pattern after  
414 unilateral motor cortex injury: a new test strategy for analysis of skilled limb movements in  
415 neurological mouse models. *J Neurosci Methods*. 2006;153(1):104-13. Epub 2005/11/29. doi:  
416 10.1016/j.jneumeth.2005.10.011. PubMed PMID: 16309746.
- 417 25. Altamentova S, Rumajogee P, Hong J, Beldick SR, Park SJ, Yee A, et al. Methylprednisolone  
418 Reduces Persistent Post-ischemic Inflammation in a Rat Hypoxia-Ischemia Model of Perinatal Stroke.  
419 *Transl Stroke Res*. 2020;11(5):1117-36. Epub 2020/03/07. doi: 10.1007/s12975-020-00792-2.  
420 PubMed PMID: 32140998.
- 421 26. Bartko JJ. On various intraclass correlation reliability coefficients. *Psychological Bulletin*.  
422 1976;83(5):762-5. doi: 10.1037/0033-2909.83.5.762.
- 423 27. Shrout PE, Fleiss JL. Intraclass correlations: uses in assessing rater reliability. *Psychol Bull*.  
424 1979;86(2):420-8. Epub 1979/03/01. doi: 10.1037//0033-2909.86.2.420. PubMed PMID: 18839484.
- 425 28. Beauchet O, Herrmann FR, Grandjean R, Dubost V, Allali G. Concurrent validity of SMTEC  
426 footswitches system for the measurement of temporal gait parameters. *Gait Posture*.  
427 2008;27(1):156-9. Epub 2007/02/13. doi: 10.1016/j.gaitpost.2006.12.017. PubMed PMID: 17291765.

- 428 29. Jacobs BY, Kloefkorn HE, Allen KD. Gait analysis methods for rodent models of osteoarthritis.  
429 Curr Pain Headache Rep. 2014;18(10):456. Epub 2014/08/28. doi: 10.1007/s11916-014-0456-x.  
430 PubMed PMID: 25160712; PubMed Central PMCID: PMC4180257.
- 431 30. Riek-Burchardt M, Henrich-Noack P, Metz GA, Reymann KG. Detection of chronic  
432 sensorimotor impairments in the ladder rung walking task in rats with endothelin-1-induced mild  
433 focal ischemia. J Neurosci Methods. 2004;137(2):227-33. Epub 2004/07/21. doi:  
434 10.1016/j.jneumeth.2004.02.012. PubMed PMID: 15262065.
- 435 31. Souza ACd, Alexandre NMC, Guirardello EdB. Propriedades psicométricas na avaliação de  
436 instrumentos: avaliação da confiabilidade e da validade. Epidemiologia e Serviços de Saúde.  
437 2017;26:649-59.
- 438 32. Meseguer-Henarejos AB, Sánchez-Meca J, López-Pina JA, Carles-Hernández R. Inter- and  
439 intra-rater reliability of the Modified Ashworth Scale: a systematic review and meta-analysis. Eur J  
440 Phys Rehabil Med. 2018;54(4):576-90. Epub 2017/09/14. doi: 10.23736/s1973-9087.17.04796-7.  
441 PubMed PMID: 28901119.
- 442 33. Hutchinson D, Hines S, Vijayaraghavan N, Sammond A, Metzler-Wilson K, Kuchera ML.  
443 Interexaminer reliability study of a standardized myofascial diagnostic technique of the superior  
444 thoracic inlet. J Bodyw Mov Ther. 2017;21(3):658-63. Epub 2017/07/29. doi:  
445 10.1016/j.jbmt.2017.05.004. PubMed PMID: 28750981.
- 446 34. Metz GAS, Schwab ME, Welzl H. The effects of acute and chronic stress on motor and  
447 sensory performance in male Lewis rats. Physiology & Behavior. 2001;72(1-2):29-35. doi:  
448 10.1016/S0031-9384(00)00371-1.
- 449 35. Berryman ER, Harris RL, Moalli M, Bagi CM. Digigait quantitation of gait dynamics in rat  
450 rheumatoid arthritis model. J Musculoskelet Neuronal Interact. 2009;9(2):89-98. Epub 2009/06/12.  
451 PubMed PMID: 19516084.
- 452 36. Vrinten DH, Hamers FF. 'CatWalk' automated quantitative gait analysis as a novel method to  
453 assess mechanical allodynia in the rat; a comparison with von Frey testing. Pain. 2003;102(1-2):203-  
454 9. Epub 2003/03/07. doi: 10.1016/s0304-3959(02)00382-2. PubMed PMID: 12620612.
- 455 37. Spitz J, Put K, Wagemans J, Williams AM, Helsen WF. Does slow motion impact on the  
456 perception of foul play in football? Eur J Sport Sci. 2017;17(6):748-56. Epub 2017/03/30. doi:  
457 10.1080/17461391.2017.1304580. PubMed PMID: 28350233.

458

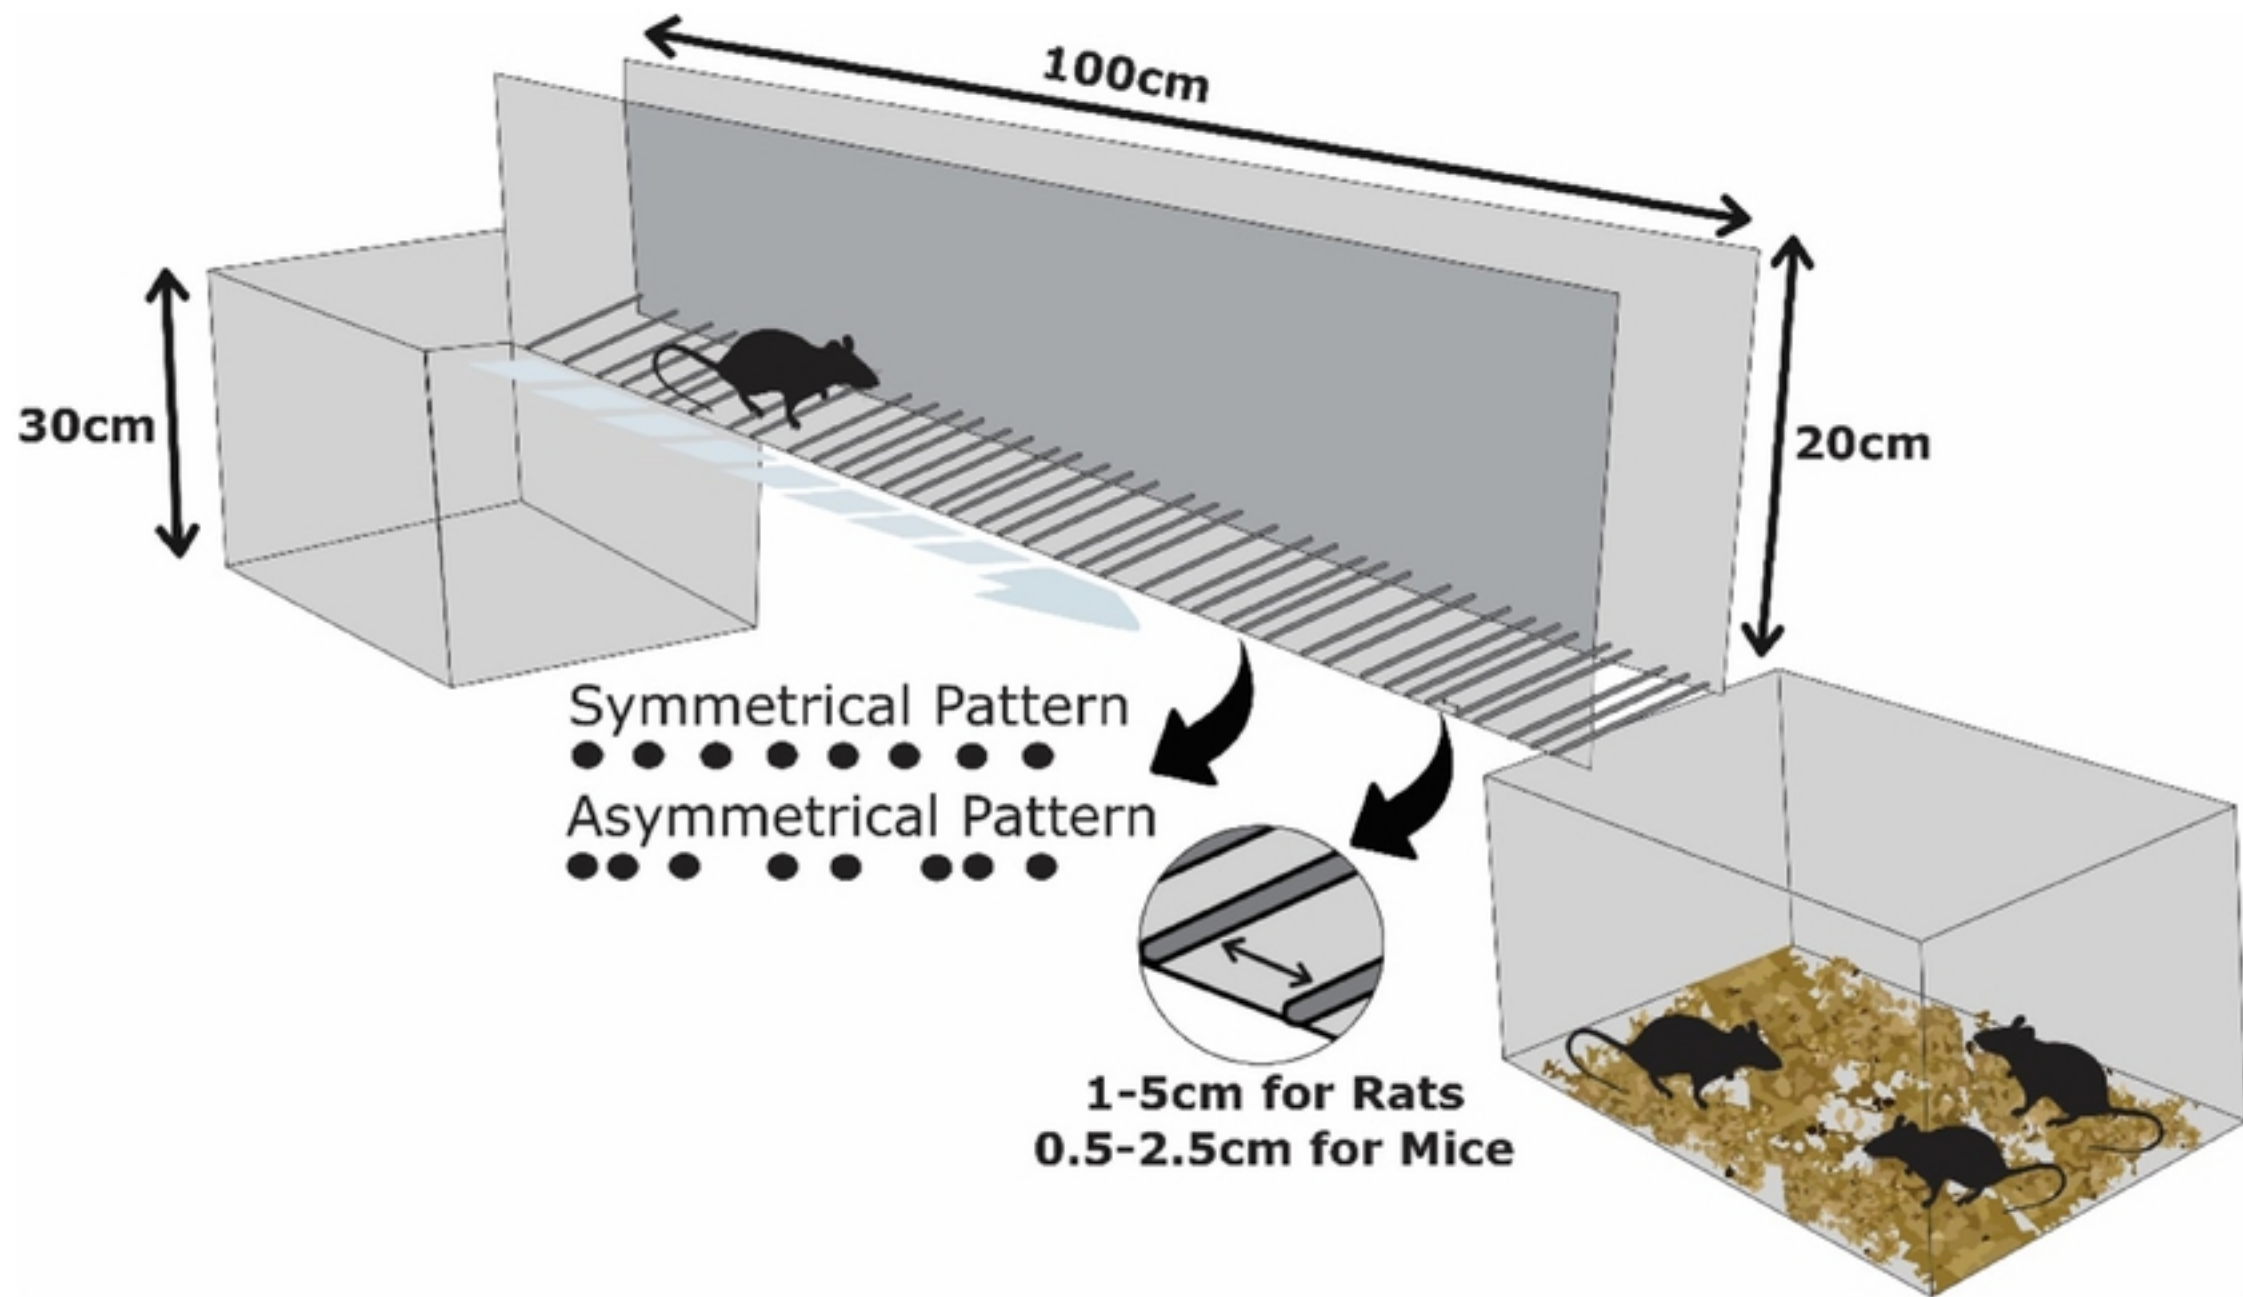

Figure 1

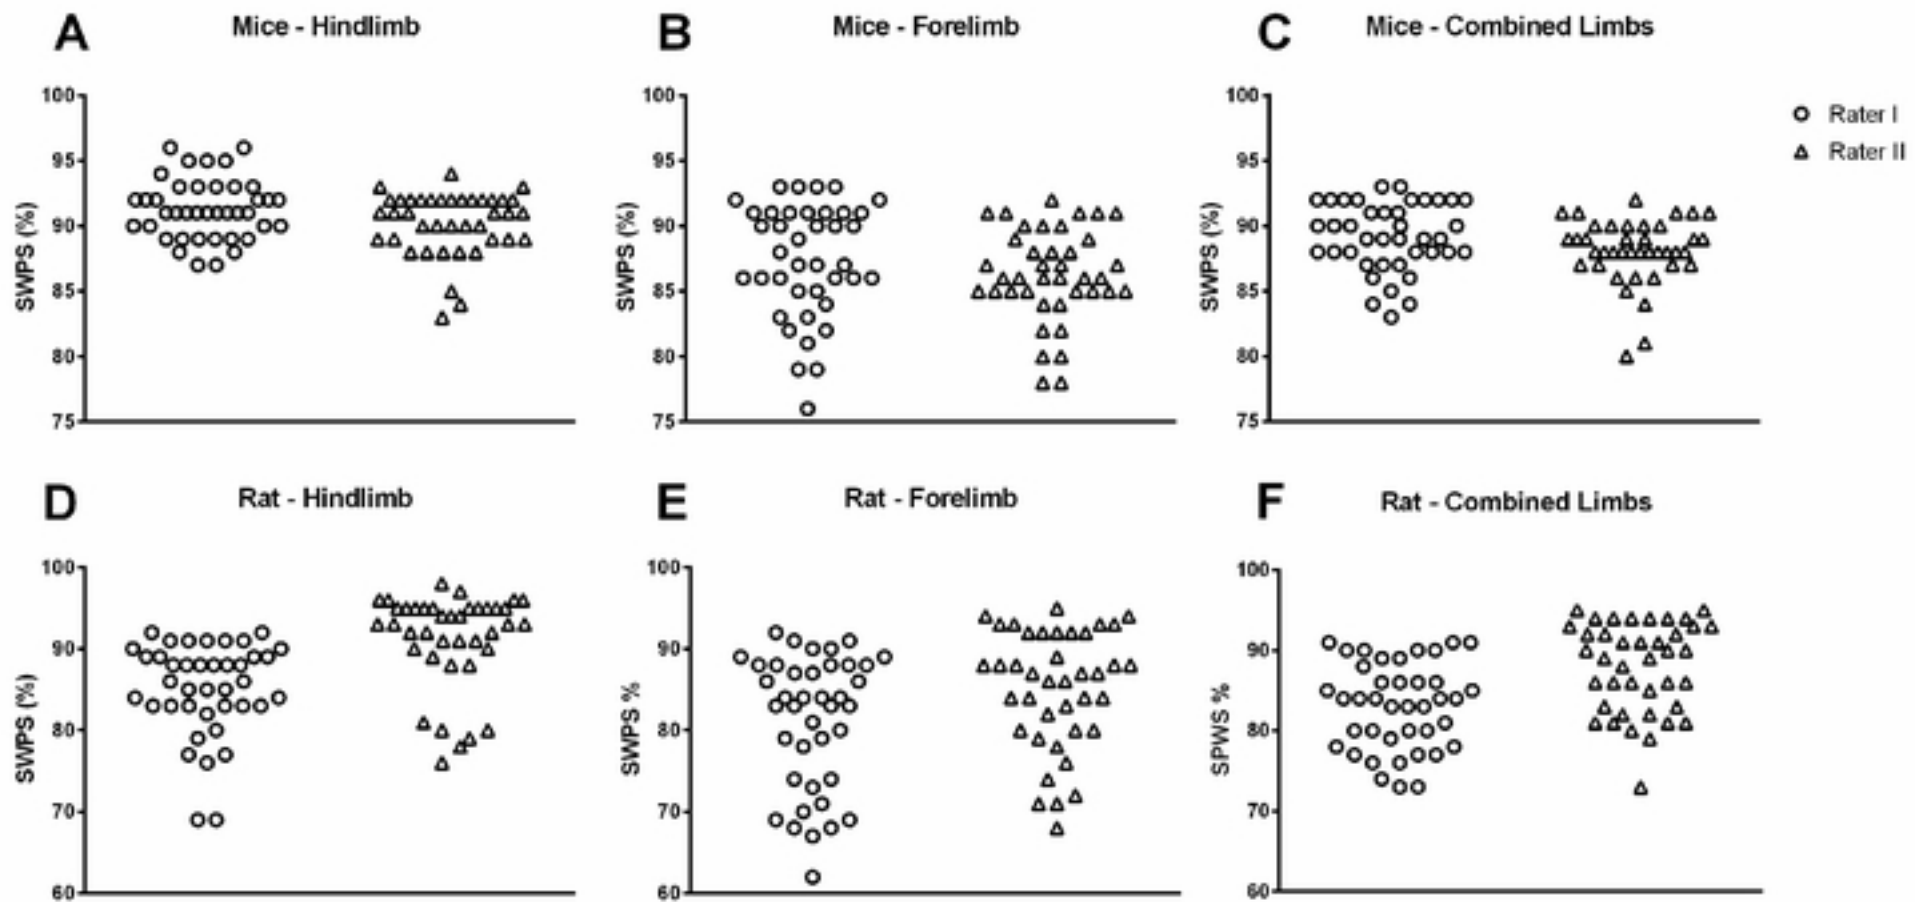

Figure 2

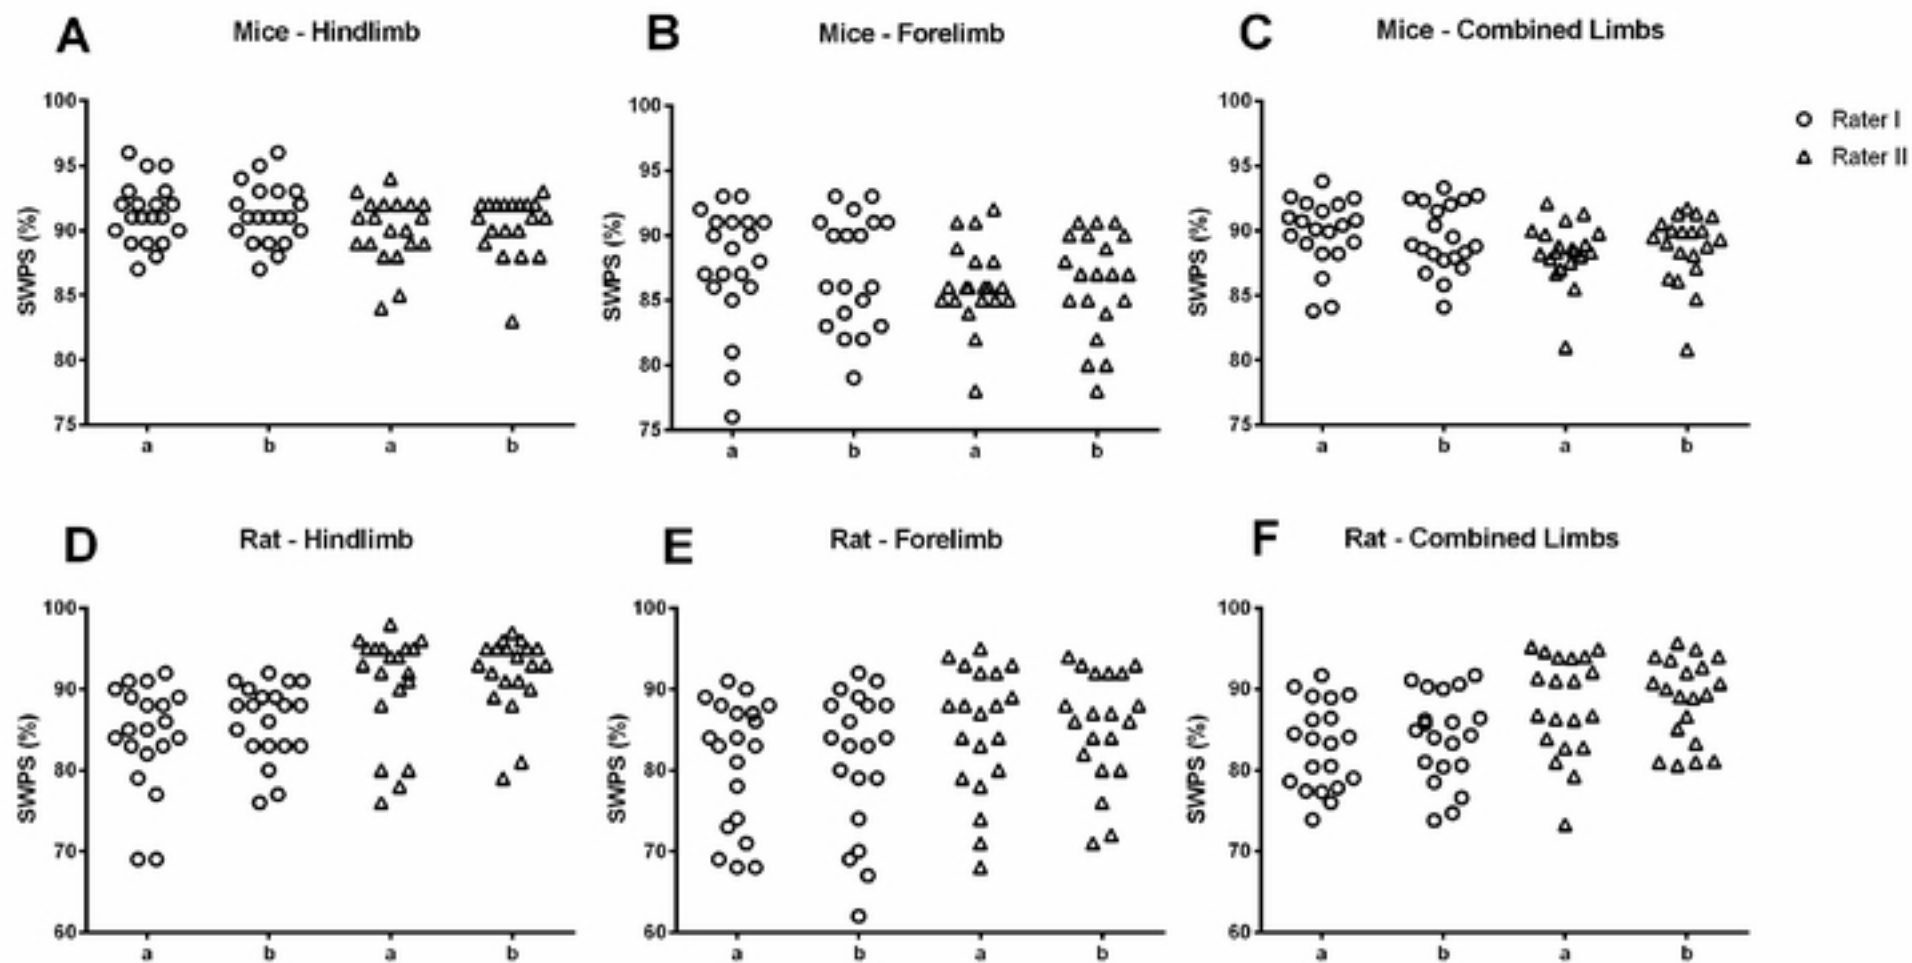

Figure 3

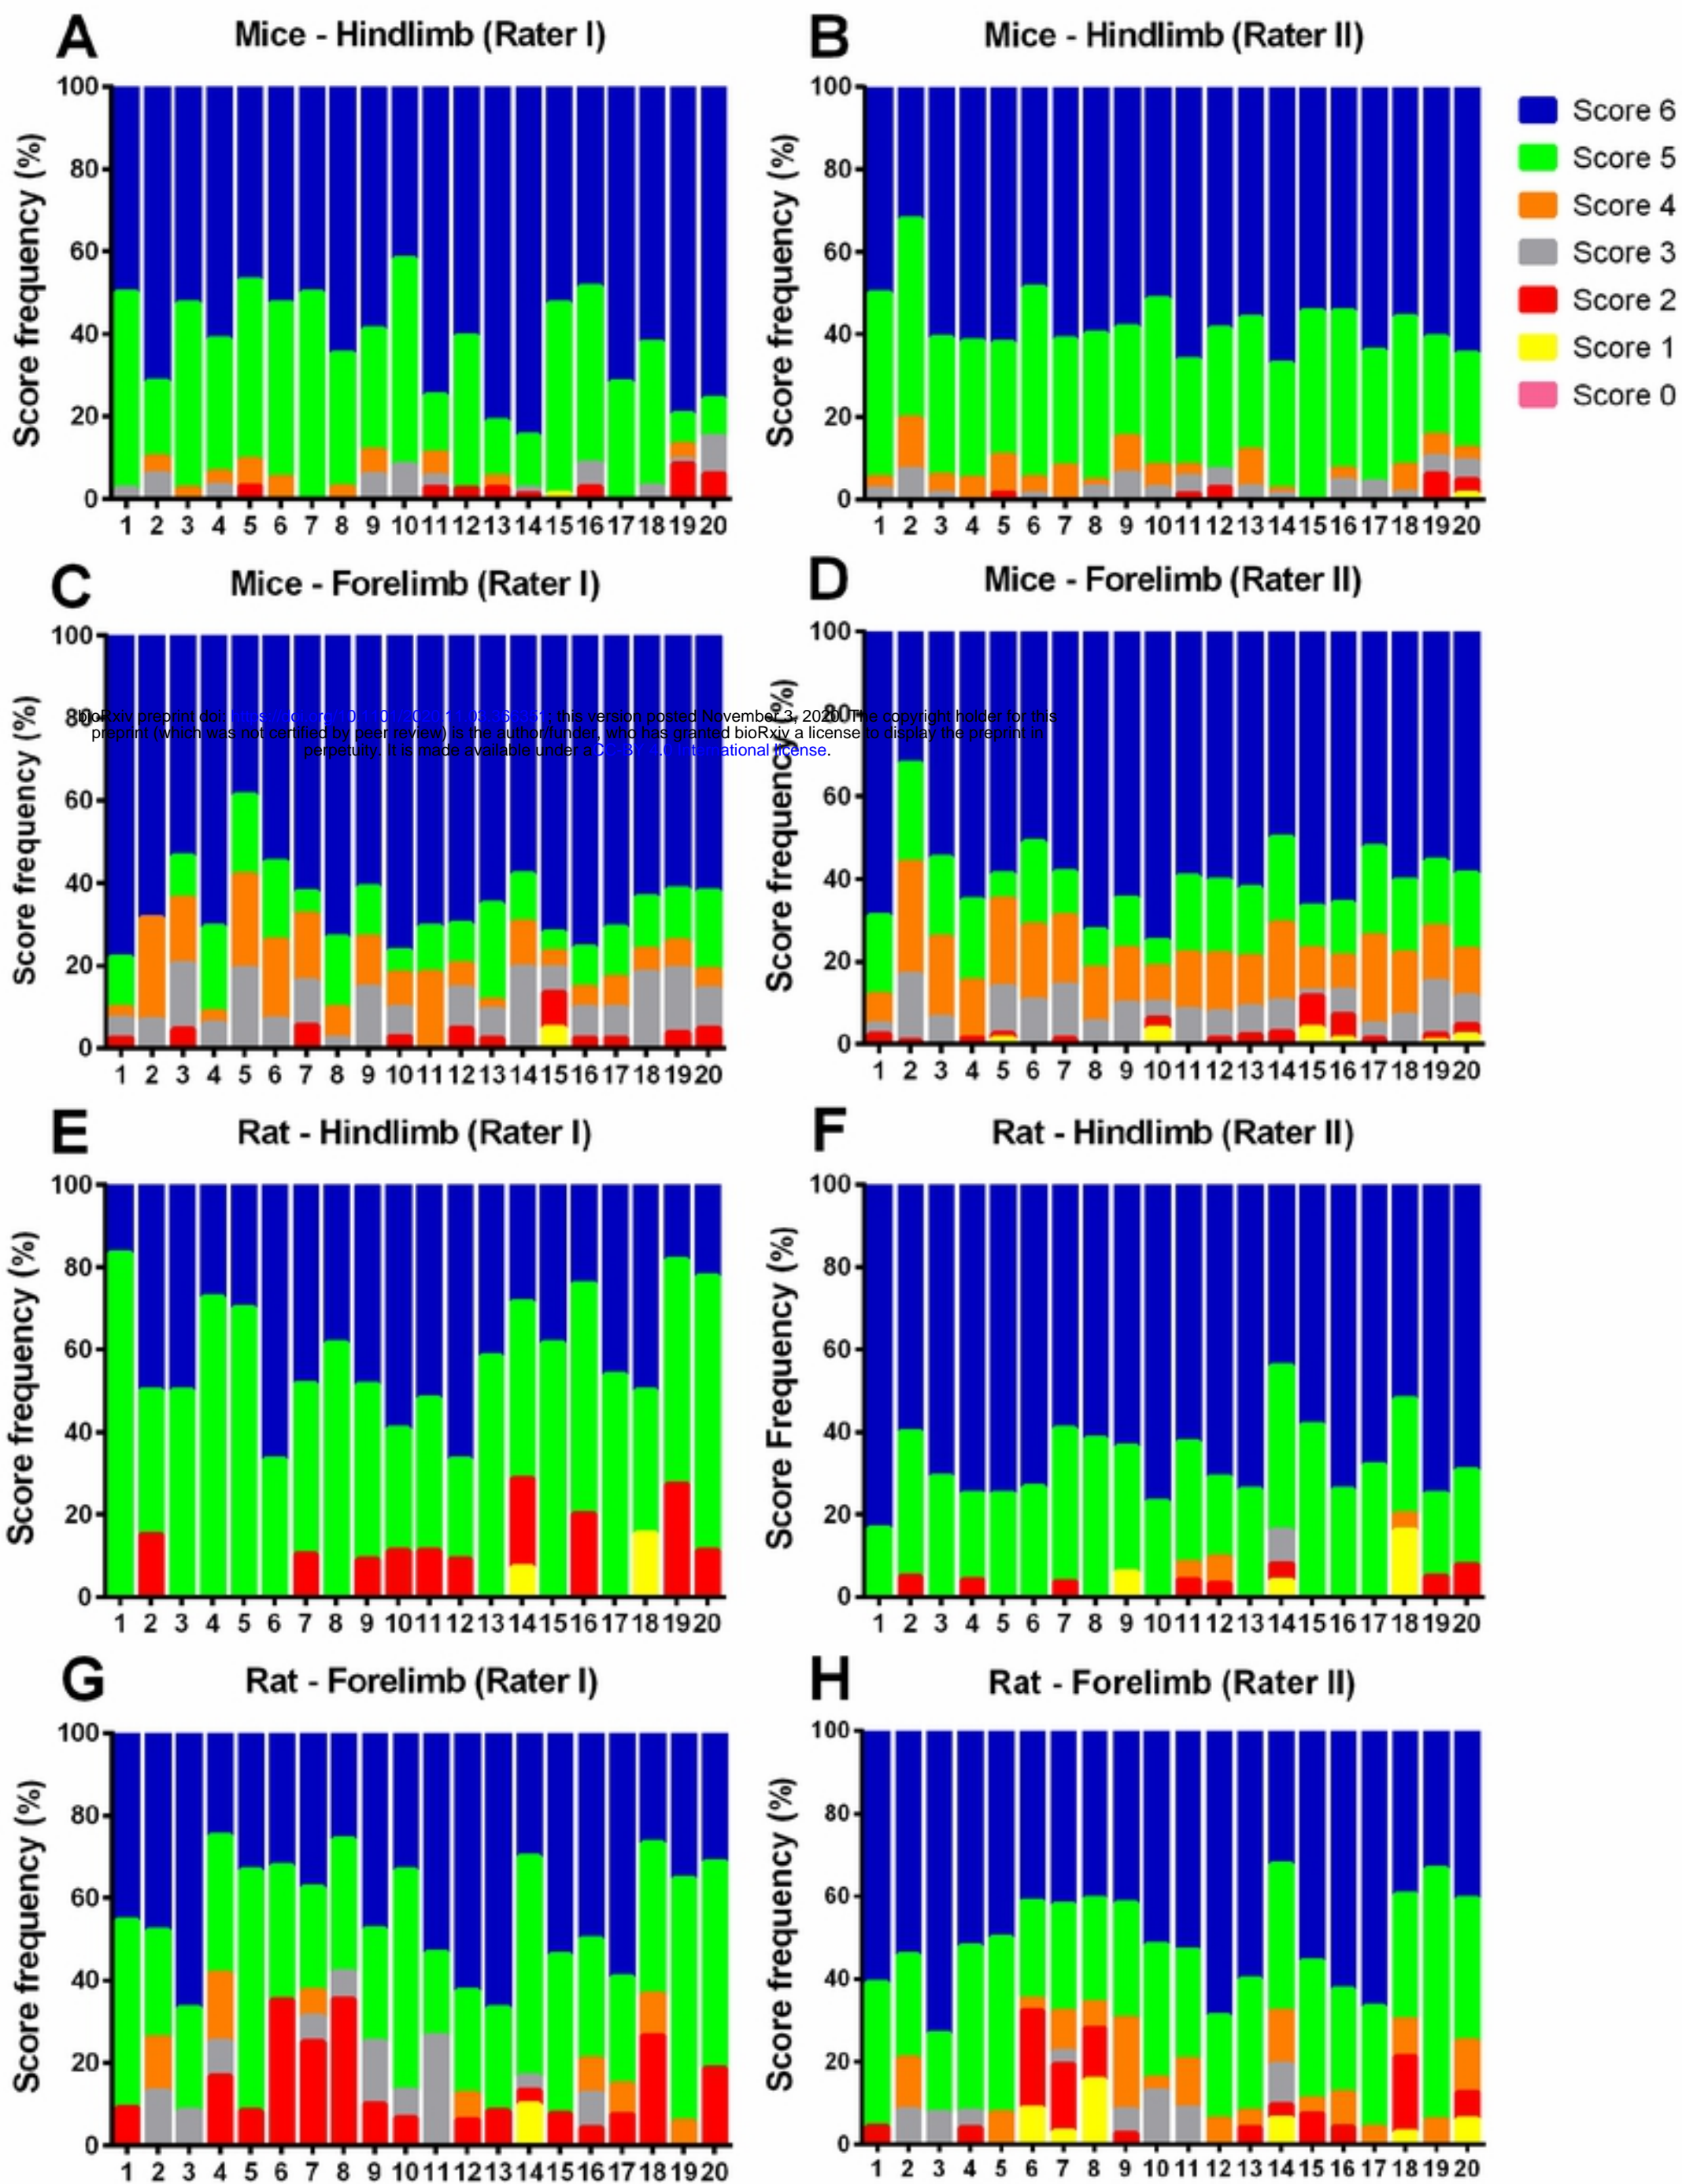

Figure 4
